# Supplementary material for: Molecular characterization and expression dynamics of MTP genes under various spatio-temporal stages and metal stress conditions in rice
Source: PubMed Central journal article supplement (PMC6538162; doi:10.1371/journal.pone.0217360), 2019-05-28

**a**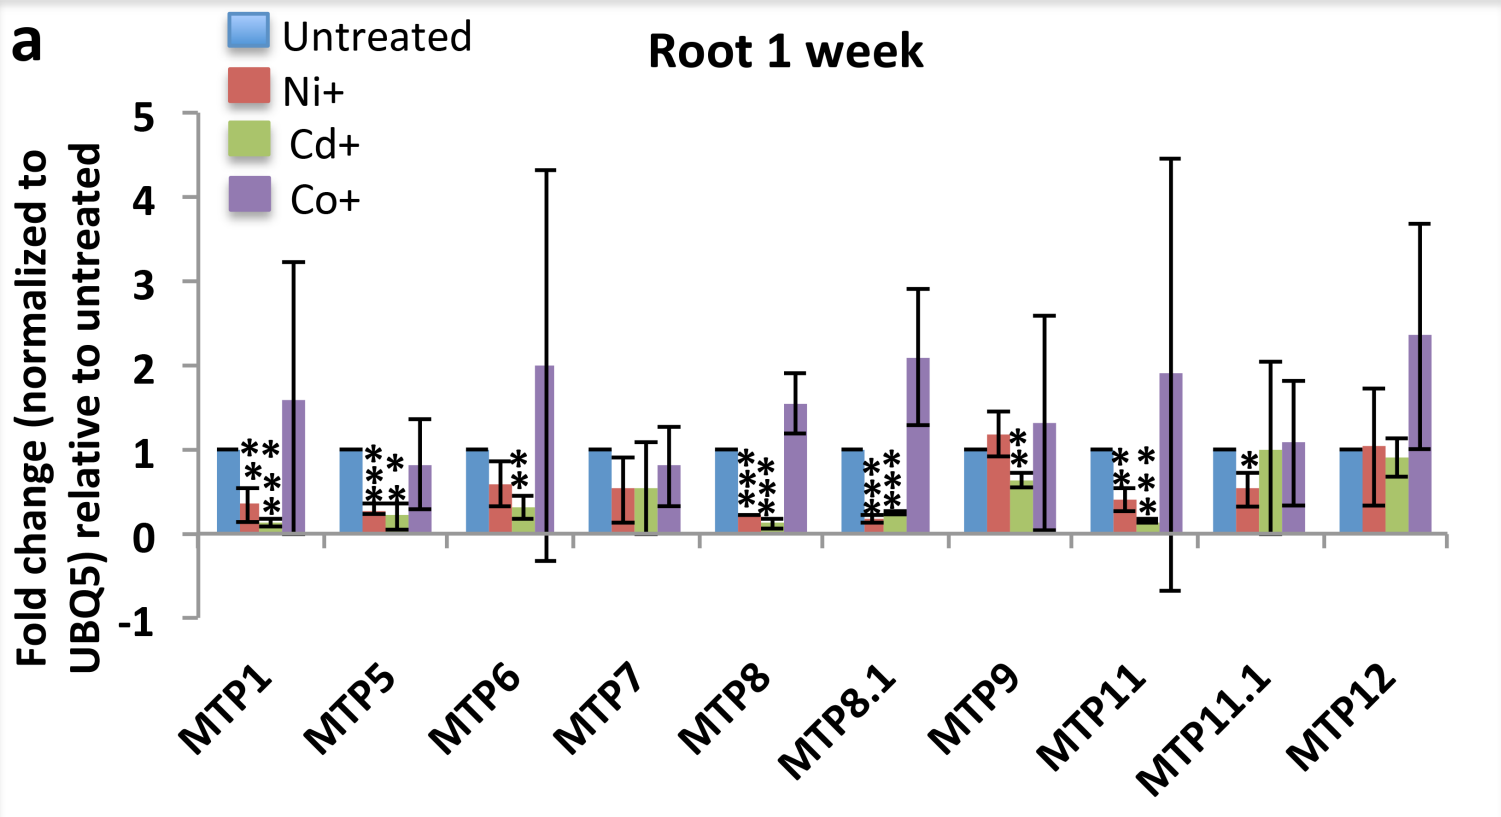**b**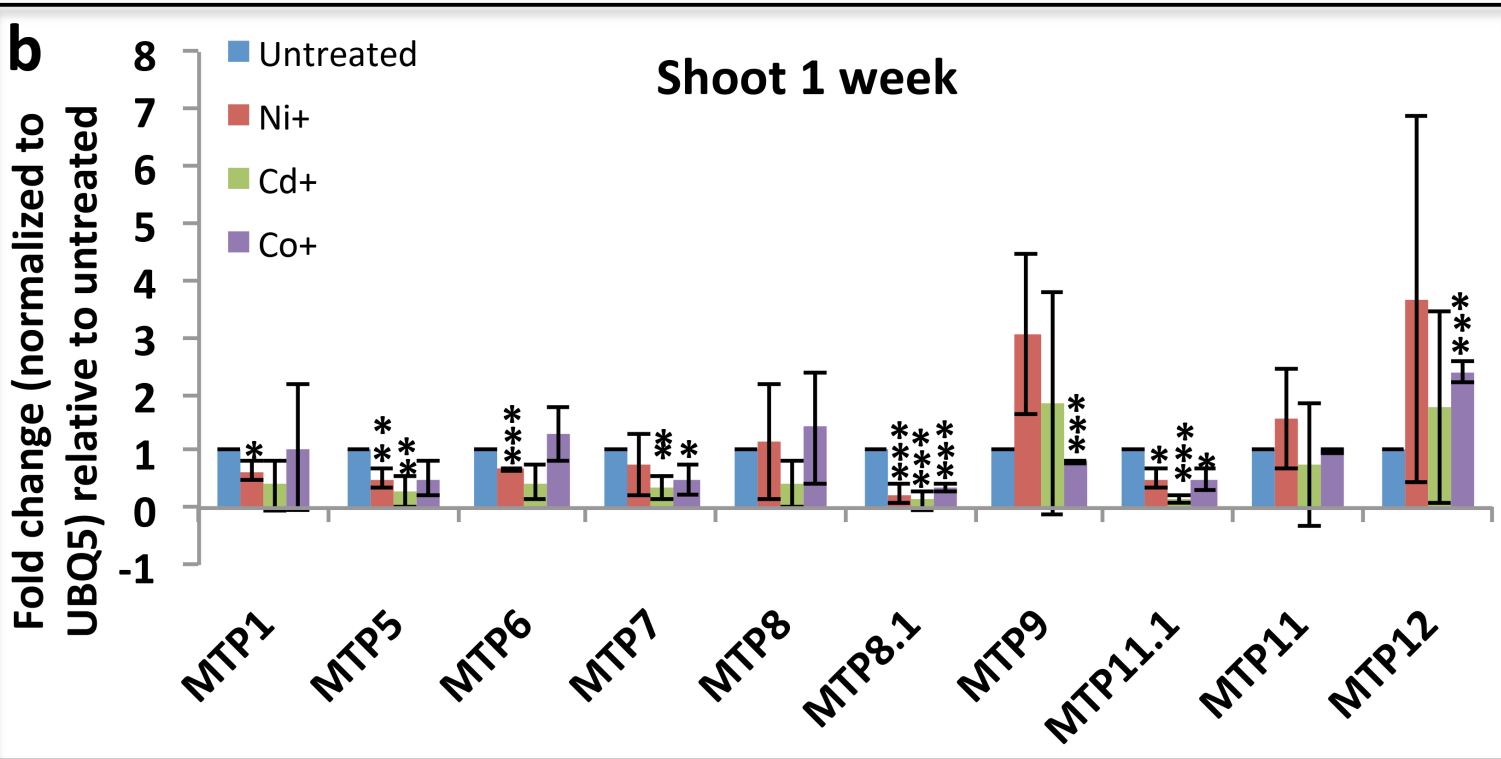

Supplement: pone.0217360.s001.pdf [file pone.0217360.s001.pdf]
